# Supplementary material for: Therapeutics for the treatment of coronavirus disease 2019 in children and adolescents
Source: PubMed Central journal article supplement — Clin Exp Pediatr. 2022 Jun 27;65(8):377–86. doi: 10.3345/cep.2022.00458 (PMC9348956; doi:10.3345/cep.2022.00458), 2022-06-27
Supplement: cep-2022-00458-suppl.pdf [file cep-2022-00458-suppl.pdf]

**Supplementary Table 1. SARS-CoV-2 monoclonal antibodies authorized for COVID-19 treatment in children and adolescents<sup>48)</sup>**

|                          | Bamlanivimab/etesevimab                                                                                                                                                                                                                                                                                                                                                                                                                                                                                                                                                                                                                                                                                             | Casirivimab/imdevimab                                        | Sotrovimab           |
|--------------------------|---------------------------------------------------------------------------------------------------------------------------------------------------------------------------------------------------------------------------------------------------------------------------------------------------------------------------------------------------------------------------------------------------------------------------------------------------------------------------------------------------------------------------------------------------------------------------------------------------------------------------------------------------------------------------------------------------------------------|--------------------------------------------------------------|----------------------|
| Minimum age and weight   | >1 kg<br>Available for infants and young children <12 years                                                                                                                                                                                                                                                                                                                                                                                                                                                                                                                                                                                                                                                         | ≥12 years and >40 kg                                         | ≥12 years and >40 kg |
| Dosage                   | 1 to 12 kg: 12 mg/kg and 24 mg/kg<br>>12 to 20 kg: 175 mg/350 mg<br>>20 to 40 kg: 350 mg/700 mg<br>≥40 kg: 700 mg/1,400 mg                                                                                                                                                                                                                                                                                                                                                                                                                                                                                                                                                                                          | 600 mg/600 mg                                                | 500 mg               |
| Route of administration  | IV                                                                                                                                                                                                                                                                                                                                                                                                                                                                                                                                                                                                                                                                                                                  | IV preferred; SC alternative if IV not feasible or available | IV                   |
| Timing of administration | Provide ASAP after positive SARS-CoV-2 test and within 10 days of symptom onset                                                                                                                                                                                                                                                                                                                                                                                                                                                                                                                                                                                                                                     |                                                              |                      |
| EUA criteria             | Nonhospitalized patient, and<br>Laboratory-confirmed SARS-CoV-2 infection, and<br>Mild to moderate COVID-19, and<br>Within 10 days of symptom onset, and<br>High risk for progressing to severe COVID-19 and/or hospitalization                                                                                                                                                                                                                                                                                                                                                                                                                                                                                     |                                                              |                      |
| High-risk criteria       | Body mass index ≥ 85th percentile for age and gender<br>Immunosuppressive disease or receipt of immunosuppressive therapies<br>Neurodevelopmental disorders (e.g., cerebral palsy, trisomy 21)<br>A medical-related technological dependence that is not related to COVID-19 (e.g., tracheostomy, positive pressure ventilation, gastrostomy)<br>Sickle cell disease<br>Congenital or acquired heart disease<br>Chronic lung disease (e.g., interstitial lung disease, tuberculosis); asthma or other chronic respiratory disease that requires daily medication for control<br>Diabetes<br>Chronic kidney disease<br>Chronic liver disease (e.g., cirrhosis, autoimmune hepatitis)<br>Pregnancy; or<br>Age <1 year |                                                              |                      |

SARS-CoV-2, severe acute respiratory syndrome coronavirus 2; COVID-19, coronavirus disease 2019; IV, intravenous; SC, subcutaneous; ASAP, as soon as possible; EUA, emergency use approval.
